# Supplementary material for: Fbxw7 regulates lipid metabolism and cell fate decisions in the mouse liver
Source: JCI journal article supplement (doi:10.1172/jci40725), 2010-12-01
Supplement: sd1 [file 1]

301 Moved Permanently

# Moved Permanently

The document has moved here.
